# Supplementary material
Source: publisher figshare collection journal article supplement (https://acs.figshare.com/ndownloader/files/17591639)
Supplement: Supplementary file 1 [file 17591639]

# Probing the Self-Assembly and Nonlinear Friction Behavior of Confined Gold Nano-Particles

*Jun Huang,<sup>\*,†</sup> Yonggan Yan,<sup>†</sup> Lei Xie,<sup>‡</sup> Hanlian Liu,<sup>†</sup> Chuanzhen Huang,<sup>†</sup> Qingye Lu,<sup>§</sup>  
Xiaoyong Qiu,<sup>\*,//</sup> and Hongbo Zeng<sup>\*,‡</sup>*

*<sup>†</sup>Center for Advanced Jet Engineering Technologies (CaJET), Key Laboratory of High-efficiency and Clean Mechanical Manufacture (Ministry of Education), School of Mechanical Engineering, Shandong University, Jinan 250061, China*

*<sup>‡</sup>Department of Chemical and Materials Engineering, University of Alberta, Edmonton, AB T6G 1H9, Canada*

*<sup>§</sup>Department of Chemical and Petroleum Engineering, University of Calgary, Calgary, AB T2N 1N4, Canada*

*//Key Laboratory of Colloid and Interface Chemistry of the Ministry of Education, School of Chemistry and Chemical Engineering, Shandong University, Jinan, Shandong 250100, China*

*\*Email: [jun.huang@email.sdu.edu.cn](mailto:jun.huang@email.sdu.edu.cn) (J.H.); [xyqiu@sdu.edu.cn](mailto:xyqiu@sdu.edu.cn) (X.Q.); [hongbo.zeng@ualberta.ca](mailto:hongbo.zeng@ualberta.ca) (H.Z.)*

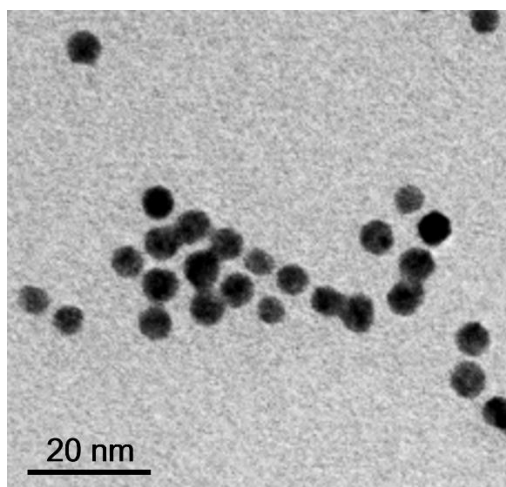

**Figure S1.** Typical transmission electron microscopy images of Au NPs purchased from Cytodiagnosics Inc.

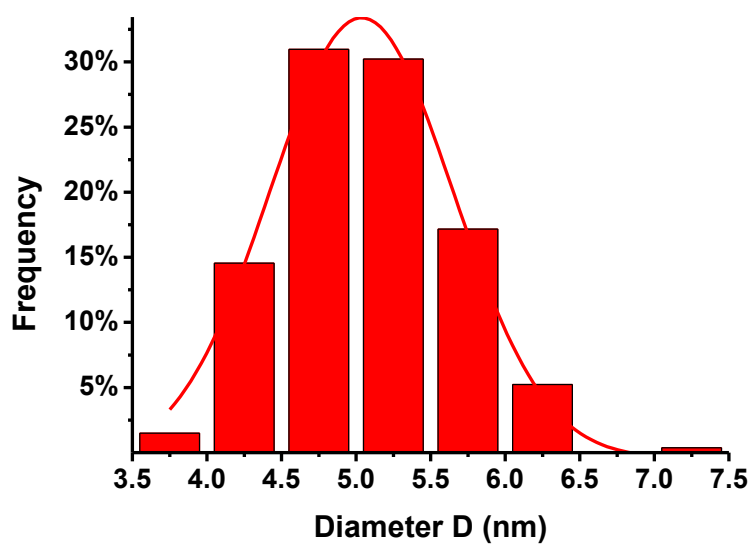

**Figure S2.** Histograms and the fitted Gaussian distributions of measured size of Au NPs (~ 270 particles) used in this work.

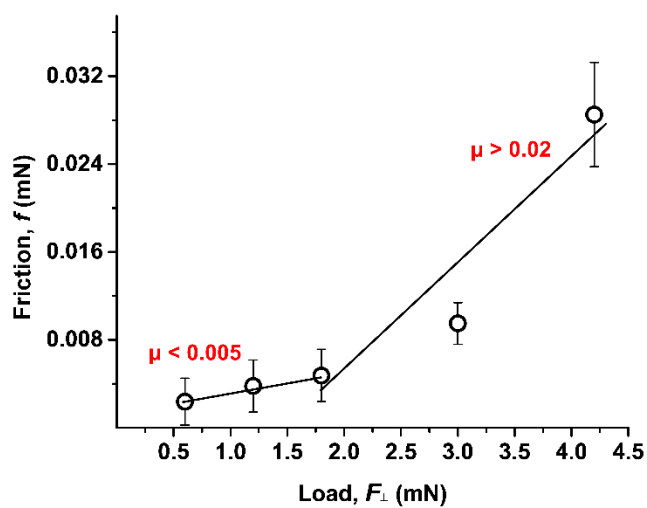

**Figure S3.** Friction force ( $f$ ) as a function of normal load ( $F_{\perp}$ ) for two mica surfaces injecting Au nanoparticles, the shear velocity  $v = 140$  nm/s

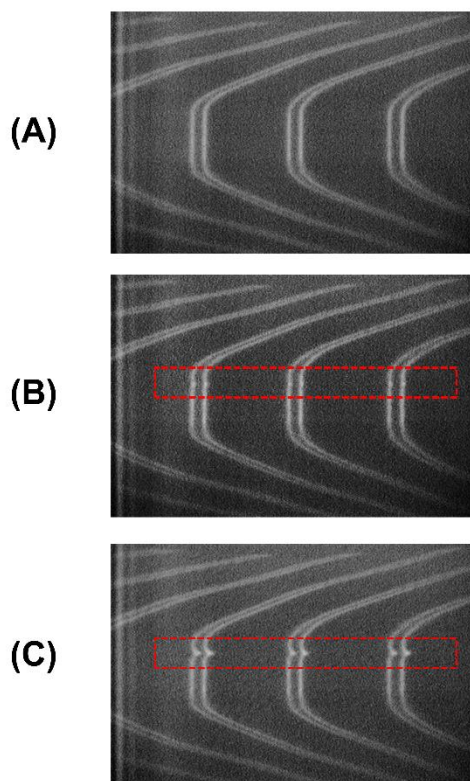

**Figure S4.** The change of FECO images during continuous sliding ( $F_{\perp} > 0.6$  mN), the deformation shown in C proved the damage of mica substrate at the sliding zone,

The equations used for calculating Debye length ( $\lambda_D$ ) are shown in Equation S1-S2 as follows,<sup>1</sup>

$$\lambda_D = \sqrt{\frac{\varepsilon_r \varepsilon_0 k_B T}{N_A q_0^2 I}} \quad (S1)$$

$$I = \frac{1}{2} \sum_{i=1}^n M_i z_i^2 \quad (S2)$$

where  $\varepsilon_r$  is the relative permittivity of the aqueous medium,  $\varepsilon_0$  is the vacuum permittivity,  $T$  is the temperature in Kelvin,  $k_B$  is the Boltzmann constant,  $N_A$  is the Avogadro's number,  $q_0$  is the elementary electric charge,  $n$  is number of ion species in the solution,  $I$  represents the ionic strength of the electrolytic buffer solution, and  $M_i$  and  $z_i$  represent the ion concentration and the number of ion charge, respectively.

## References

1. Israelachvili, J. N., *Intermolecular and Surface Forces*. Academic press: 2011; p 704.
